# Supplementary material for: Genetic and karyotype divergence between parents affect clonality and sterility in hybrids
Source: eLife. 2023 Nov 6;12:RP88366. doi: 10.7554/eLife.88366 (PMC10627513; doi:10.7554/eLife.88366)
Supplement: Supplementary file 1. — The references are indicated for species karyotypes that were previously described. The Karyotype of C. ohridana is published for the first time in this work. [file elife-88366-supp1.xlsx]

## Sheet: Sheet1
Species ID	Nr. of chromosomes	Nr. of m/sm	Nr. of a/st	Ratio of a/st	Reference	RAG1 accession numbers
C. elongatoides	50	48	2	0.04	69	KJ885726, KJ885727, KJ885728, KJ885730, KJ885731
C. taenia	48	28	20	0.417	69	KJ885721, KJ885722, KJ885723, KJ885724, KJ885725
C. pontica	50	40	10	0.2	Current study	CRUM3_1_pontica, CRUM3_1b_pontica, COB3_3_pontica
C. tanaitica	50	40	10	0.2	22	KJ885732, KJ885733
C. taurica	50	40	10	0.2	70	COBVB2_3_taurica,COBVB2_3b_taurica, COBVB13_3_taurica, COBVB13_2_taurica
C. strumicae	50	20	30	0.6	71	KP161179, KP161180
C. lutheri	50	16	34	0.68	72	JN858843, JN858844, KP161170, KP161171, KP161172
C. tetralineata	50	16	34	0.68	72	KP161183, KP161184, KP161185
M. anuguillicaudatus_clade B	50	14	36	0.72	73	AB698049, AB698050, AB698057, AB698058, AB698059, AB698060, AB698061, AB698062, AB698063, AB698064
C. hankugensis	48	18	30	0.625	74	MH464460, MH464461, MH464462, MH464463, MH464464, MH464465, MH464466, MH464467, MH464468, MH464469, MH464470, MH464471, MH464472, MH464473, MH464474, MH464475
C. bilineata	50	18	32	0.64	75	EF672416, KP161139
C. ohridana	50	20	30	0.6	Current study	EF672431, KP161161, EF672432, EF672433
I. longicorpa	50	16	34	0.68	74	MH464520, MH464521, MH464522, MH464523, MH464524, MH464525, MH464526, MH464527, MH464528, MH464529, MH464530, MH464531, MH464532, MH464533
C. biwae	48	38	10	0.208	76	AB531331, AB531336, AB531337
M. anguillicaudatus_clade A	50	14	36	0.72	73	AB698051, AB698052, AB698053, AB698054, AB698055, AB698056
L. echigonia	50	12	38	0.76	77	DQ025803
